# Supplementary material for: High expression of SLCO2B1 is associated with prostate cancer recurrence after radical prostatectomy
Source: PubMed Central journal article supplement (PMC5865664; doi:10.18632/oncotarget.24453), 2018-02-08
Supplement: oncotarget-09-14207-s001.pdf [file oncotarget-09-14207-s001.pdf]

# High expression of SLCO2B1 is associated with prostate cancer recurrence after radical prostatectomy

## SUPPLEMENTARY MATERIALS

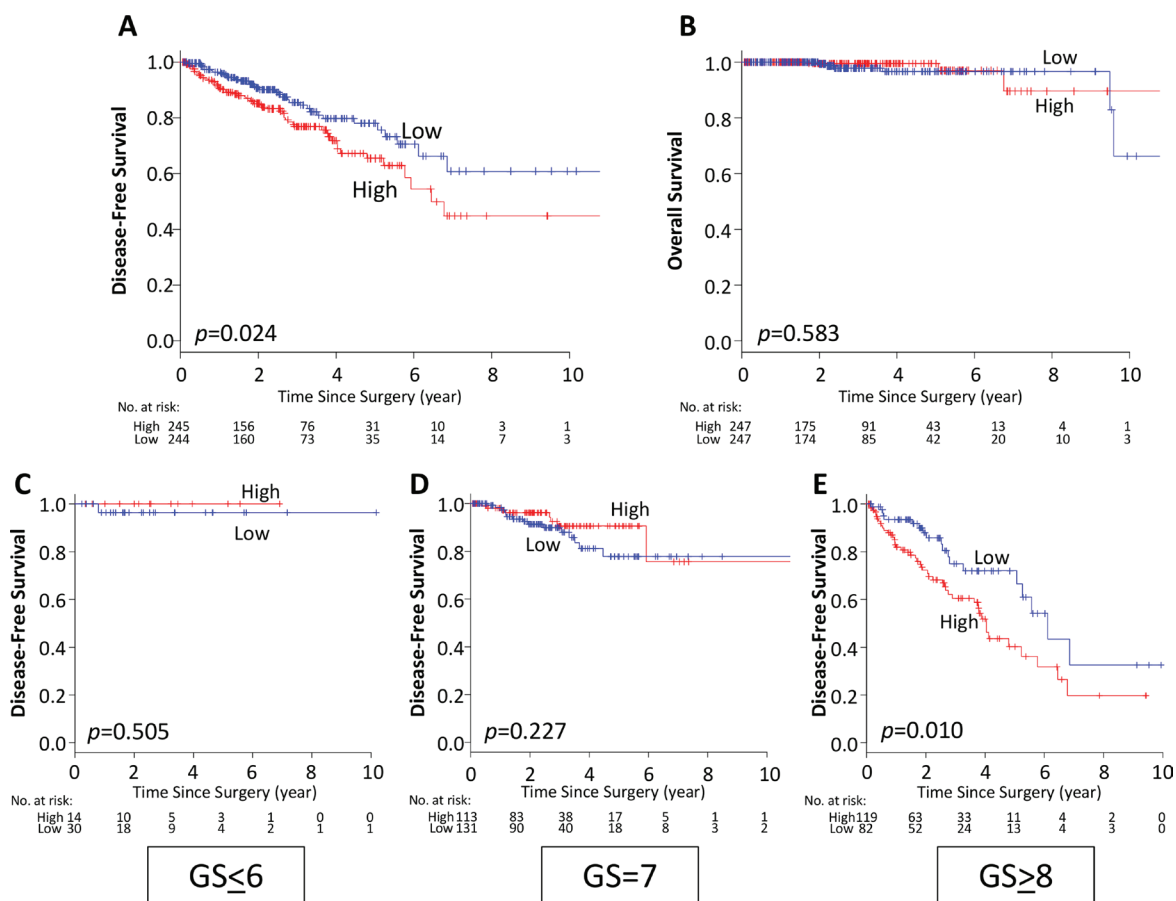

**Supplementary Figure 1: SLCO2B1 expression and patient’s survival validation using another cut off.** (A) DFS and (B) OS classified by SLCO2B1 expression using median cut off in whole TCGA PCa patients. DFS classified by SLCO2B1 expression level using median cutoff in the subgroups according to GS in TCGA PCa patients, (C)  $GS \leq 6$ , (D)  $GS = 7$ , (E)  $GS \geq 8$ . Red line; high expression, blue line; low expression of SLCO2B1.

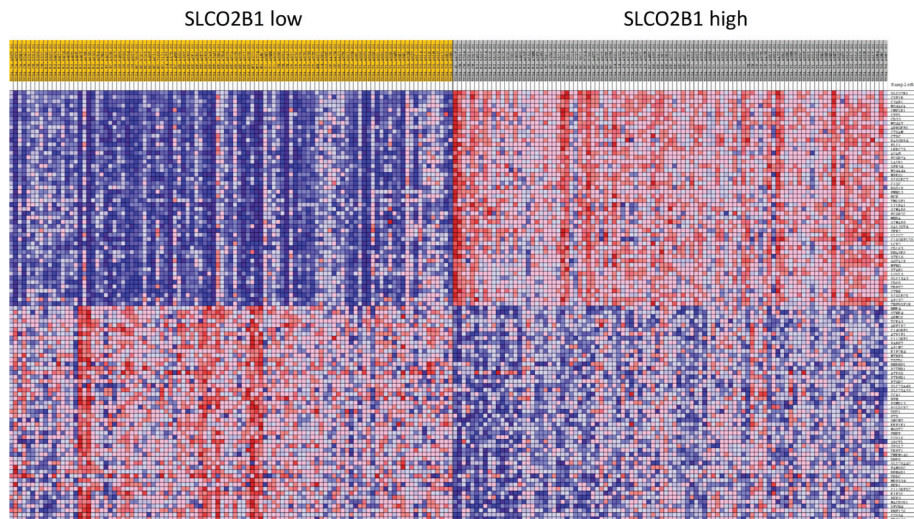

**Supplementary Figure 2: Heatmap of differently expressed genes between SLCO2B1 high and low expressed tumors in TCGA PCa patients with GS  $\geq$  8.**

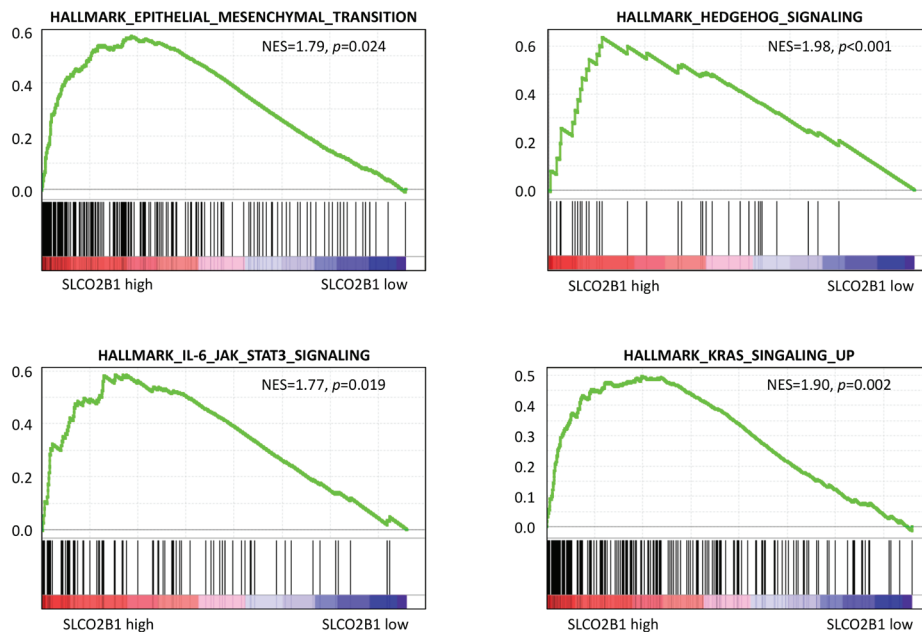

**Supplementary Figure 3: GSEA between SLCO2B1 high and low expression in patients with GS < 7.**

**Supplementary Table 1: Top 50 upregulated and downregulated genes in SLCO2B1 high expression group.**  
See Supplementary\_Table\_1

**Supplementary Table 2: Gene sets enriched in SLCO2B1 high with GS > 8.** See Supplementary\_Table\_2

**Supplementary Table 3: Gene sets enriched in SLCO2B1 low tumors**

| Gene Set                                         | SIZE | ES          | NES         | NOM <i>p</i> -val | FDR <i>q</i> -val | FWER <i>p</i> -val |
|--------------------------------------------------|------|-------------|-------------|-------------------|-------------------|--------------------|
| HALLMARK_<br>OXIDATIVE_<br>PHOSPHORYLATION       | 197  | -0.6912735  | -2.1250546  | <0.001            | 0.004639816       | 0.007              |
| HALLMARK_MYC_<br>TARGETS_V1                      | 199  | -0.6513375  | -1.9108084  | 0.005780347       | 0.02820259        | 0.068              |
| HALLMARK_MYC_<br>TARGETS_V2                      | 58   | -0.6725976  | -1.7576495  | 0.025540275       | 0.08073441        | 0.219              |
| HALLMARK_<br>UNFOLDED_<br>PROTEIN_RESPONSE       | 109  | -0.44493386 | -1.6655595  | 0.019646365       | 0.108996086       | 0.352              |
| HALLMARK_DNA_<br>REPAIR                          | 143  | -0.41944596 | -1.5612028  | 0.05668016        | 0.15990826        | 0.514              |
| HALLMARK_FATTY_<br>ACID_METABOLISM               | 157  | -0.35975504 | -1.4081328  | 0.07984032        | 0.2764803         | 0.762              |
| HALLMARK_<br>CHOLESTEROL_<br>HOMEOSTASIS         | 73   | -0.38542786 | -1.340715   | 0.16116504        | 0.31775385        | 0.844              |
| HALLMARK_<br>ADIPOGENESIS                        | 195  | -0.32450396 | -1.3237405  | 0.12269939        | 0.2971208         | 0.857              |
| HALLMARK_<br>PEROXISOME                          | 102  | -0.29288545 | -1.2056745  | 0.19960861        | 0.40651175        | 0.934              |
| HALLMARK_<br>MTORC1_SIGNALING                    | 198  | -0.33253804 | -1.1907779  | 0.27111983        | 0.3843927         | 0.939              |
| HALLMARK_<br>ANDROGEN_<br>RESPONSE               | 98   | -0.33752018 | -1.1542249  | 0.29865125        | 0.3953616         | 0.96               |
| HALLMARK_<br>GLYCOLYSIS                          | 198  | -0.22325516 | -0.9471251  | 0.49122807        | 0.65294296        | 0.998              |
| HALLMARK_<br>REACTIVE_OXIGEN_<br>SPECIES_PATHWAY | 46   | -0.26951456 | -0.92822915 | 0.55009824        | 0.6305486         | 0.999              |
| HALLMARK_<br>PROTEIN_SECRETION                   | 95   | -0.2084143  | -0.6969045  | 0.8007737         | 0.93080914        | 1                  |
| HALLMARK_E2F_<br>TARGETS                         | 197  | -0.21470378 | -0.6038966  | 0.7598425         | 0.96377546        | 1                  |
| HALLMARK_G2M_<br>CHECKPOINT                      | 196  | -0.1173306  | -0.3544897  | 0.993988          | 0.9960832         | 1                  |

ES: enrichment score, NES: normalized enrichment score, FDR: false discovery rate, FWER: family wise error rate.
